# Supplementary material for: Exome chip association study excluded the involvement of rare coding variants with large effect sizes in the etiology of anorectal malformations
Source: PLOS journal article supplement (doi:10.1371/journal.pone.0217477), 2019-05-28
Supplement: S2 (10.1371/journal.pone.0217477.s002) [file journal.pone.0217477.s002]

## S2 Figure. Manhattan plots.

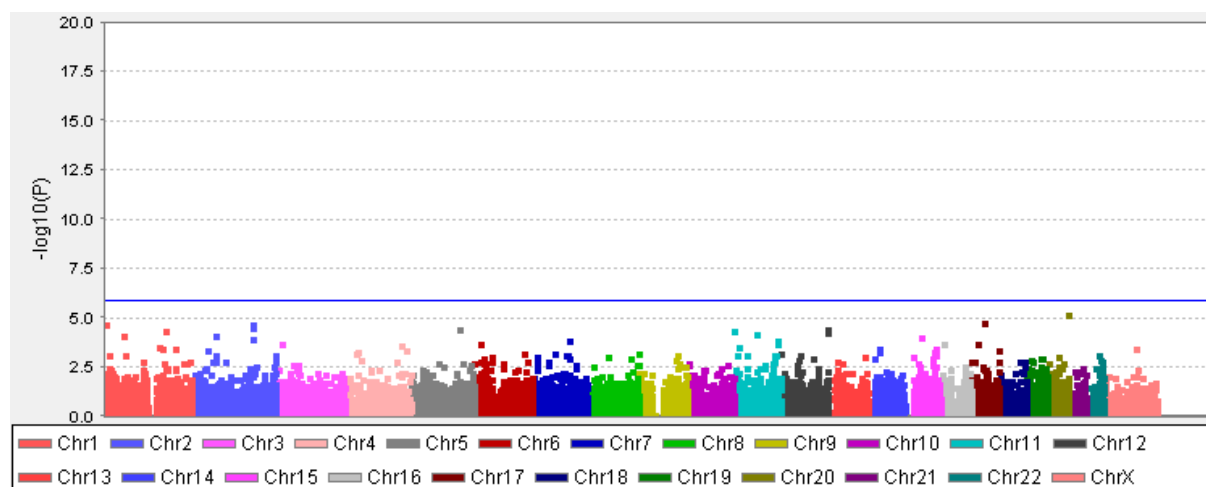

**Figure A.** Manhattan plot of the Fisher's exact test association p-values for the single variant analyses with  $MAF \geq 1.0\%$ . Chromosomes are shown on the x-axis. On the y-axis, the  $-\log_{10}$  of the  $p$ -value is shown. The blue line represents the threshold for significance after Bonferroni correction for 36,032 variants ( $1.39 \times 10^{-6}$ , which corresponds to a value of 5.86). Variants above this line are considered statistically significant.

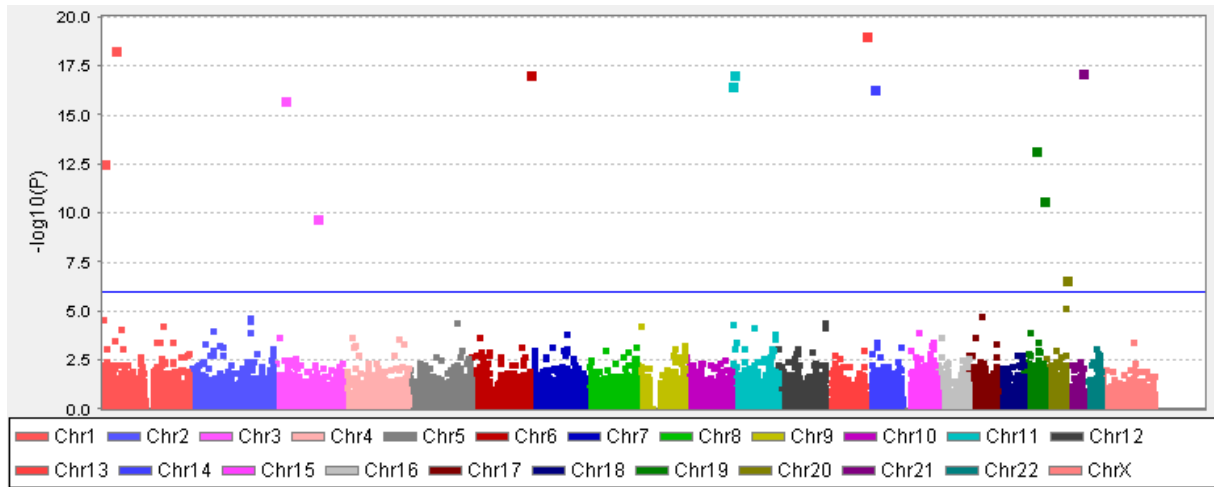

**Figure B.** Manhattan plot of the Fisher's exact test association p-values for the single variant analyses with  $MAF \geq 0.4\%$ . Chromosomes are shown on the x-axis. On the y-axis, the  $-\log 10$  of the  $p$ -value is shown. The blue line represents the threshold for significance after Bonferroni correction for 43,653 variants ( $1.15 \times 10^{-6}$ , which corresponds to a value of 5.94). Variants above this line are considered statistically significant.
